# Supplementary material
Source: PubMed Central journal article supplement (PMC5528469)
Supplement: MOL2-7-475-s001.pdf [file MOL2-7-475-s001.pdf]

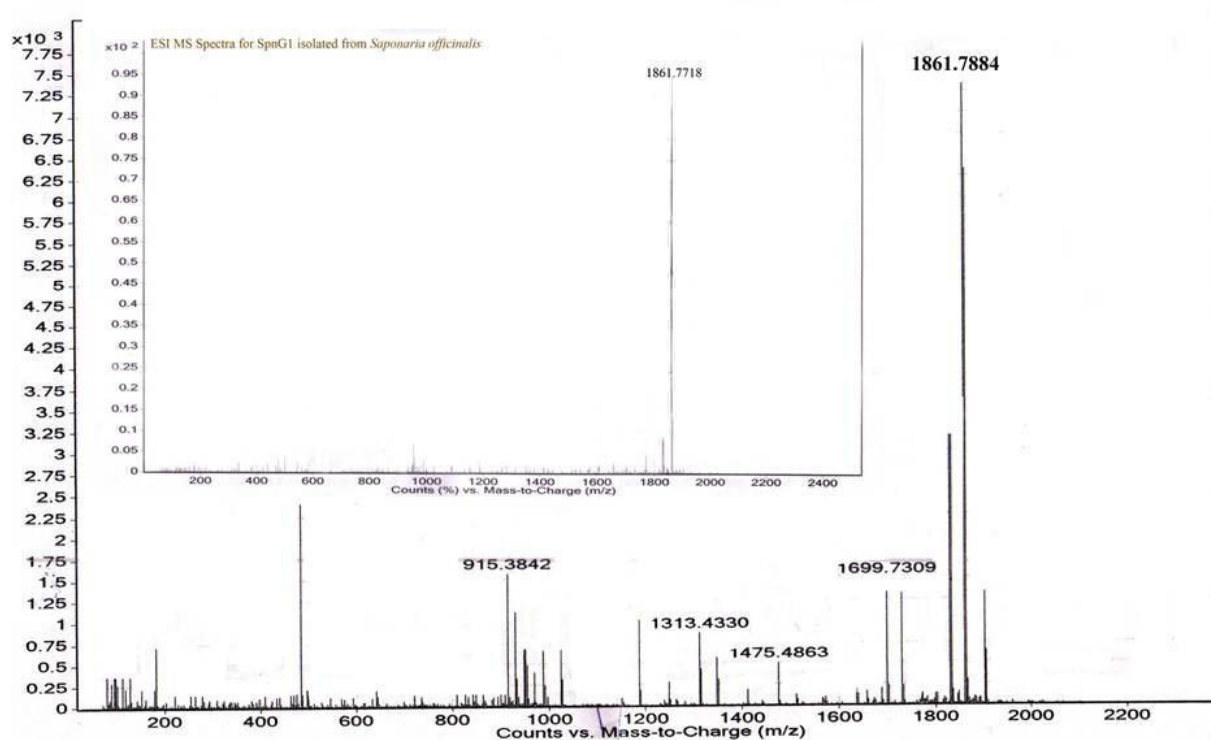

Supplementary Figure 1:

ESI-MS spectra of SO-1861 and crude acetone precipitate of methanol extract of *S. officinalis* roots. The data was collected in [M-H]<sup>-</sup> mode.

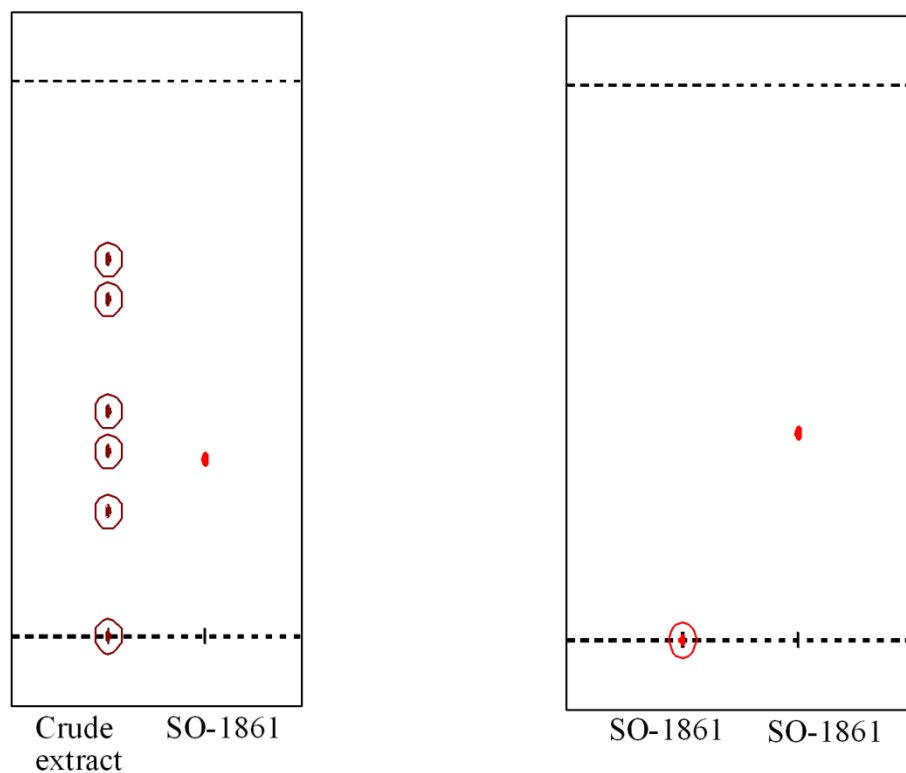

**Supplementary Fig. 2a**

**Representative thin layer chromatogram of crude saponaria extract and isolated Saponaria fraction SO-1861.**

**Supplementary Fig. 2b Representative 2-D thin layer chromatogram of SO-1861 in Chloroform : Methanol (7:3) wherein a single red spot at bottom line is the front where the spot was applied and after developing for 20 minutes the plate was dried and allowed to run in the second dimension yielding a single spot validating the purity of the sample.**

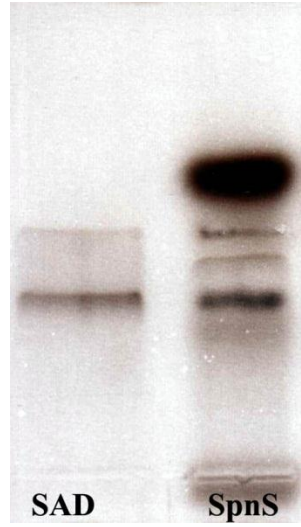

**Supplementary Fig. 3**

**Agarose gel electrophoresis chromatogram for crude Saponaria extract (SpnS) right lane and SO-1861 fraction after a single HPLC run of the acetone dialyzed precipitate of Saponaria officinalis extract (SAD).**

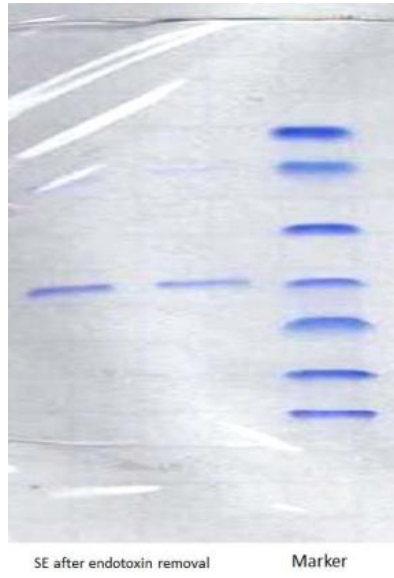

**Supplementary Fig. 4**

**SDS-PAGE chromatogram for Sap3-EGF after carrying out the endotoxin removal.**
